# Supplementary material for: A biotin targeting chimera (BioTAC) system to map small molecule interactomes in situ
Source: PubMed Central journal article supplement (PMC10695998; doi:10.1038/s41467-023-43507-5), 2023-12-04
Supplement: 41467_2023_43507_MOESM3_ESM.pdf [file 41467_2023_43507_MOESM3_ESM.pdf]

## Description of Additional Supplementary Files

File name: **Supplementary Data 1**

**Description:** Sequence of miniTurbo-FKBP12<sup>F36V</sup> construct, table of PASEF windows, and complete datasets of proteomic experiments.
